# Supplementary material for: GTSF1 accelerates target RNA cleavage by PIWI-clade Argonaute proteins
Source: PubMed Central journal article supplement (PMC9385479; doi:10.1038/s41586-022-05009-0), 2022-06-30
Supplement: 41586_2022_5009_MOESM2_ESM.pdf [file 41586_2022_5009_MOESM2_ESM.pdf]

Arif et al., Supplementary Data Fig. 1.

Extended Data Fig. 1b

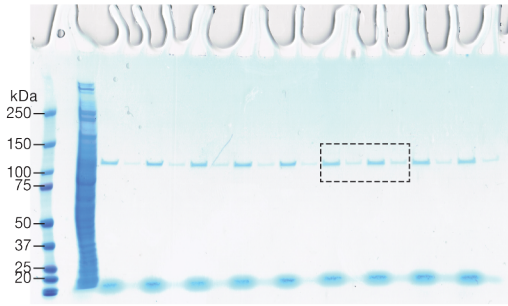

Extended Data Fig. 1c

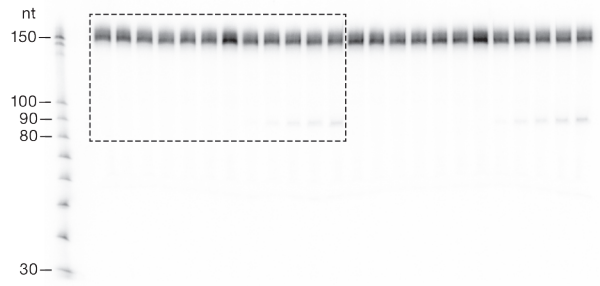

Extended Data Fig. 1d

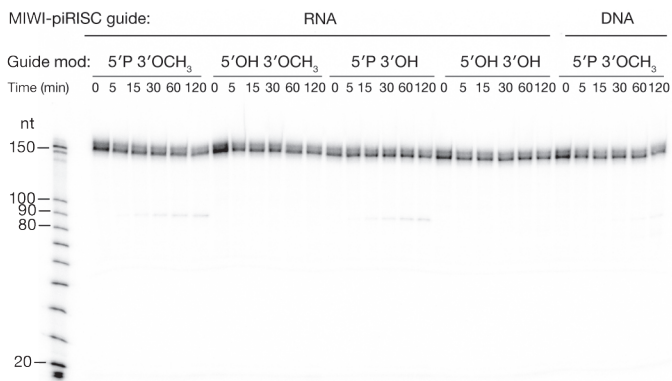

Extended Data Fig. 1e

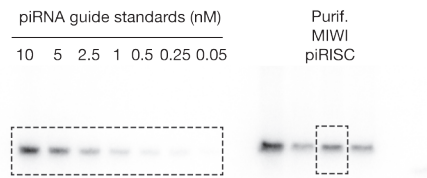

Extended Data Fig. 1f

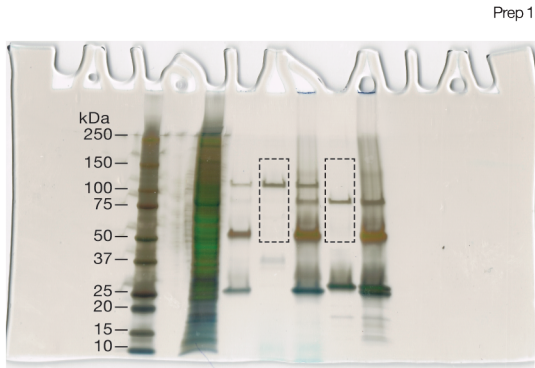

Extended Data Fig. 1g

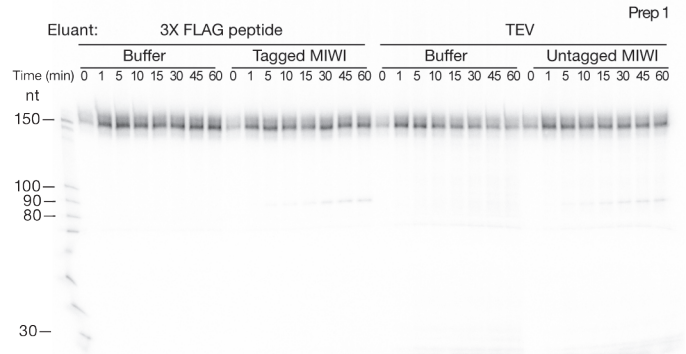

Prep 2

| Eluant: | 3X FLAG |   | TEV |   |
|---------|---------|---|-----|---|
|         | E       | B | E   | B |

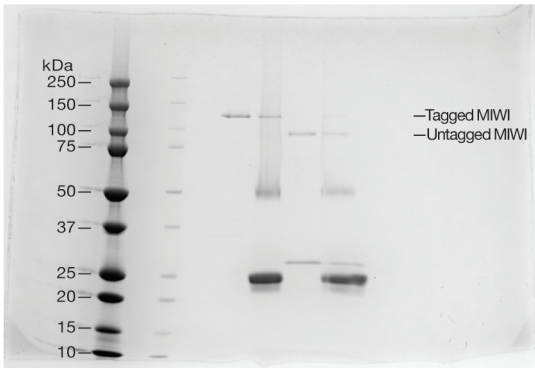

E: Eluate  
B: Beads

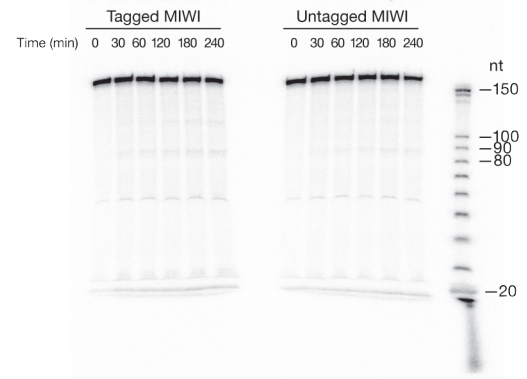

Figure 1b (top)

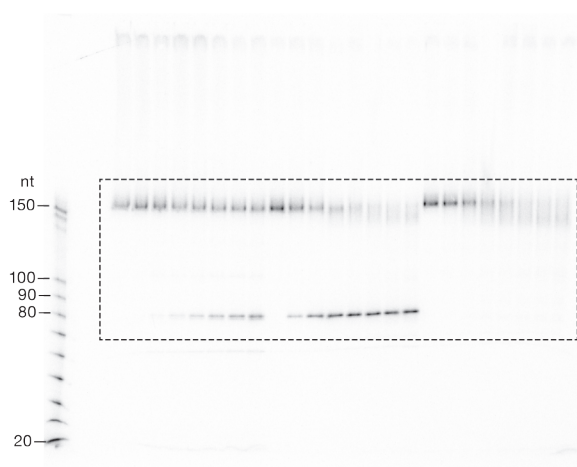

Figure 1b (bottom) and Figure 3a, 3b (5 nM target)

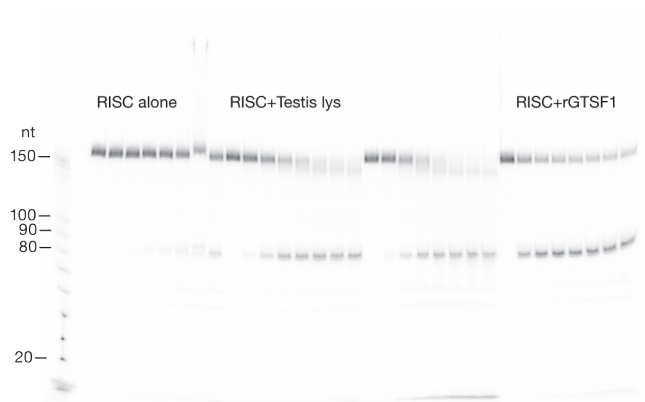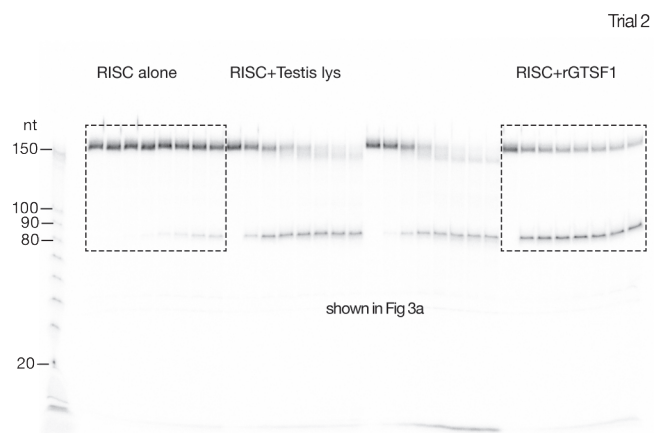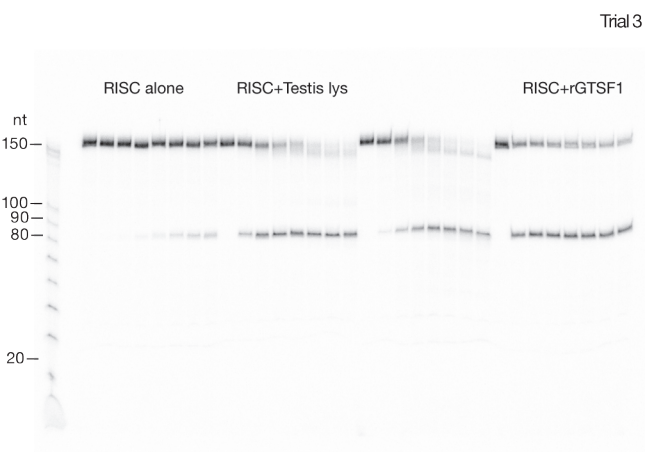

Figure 1c

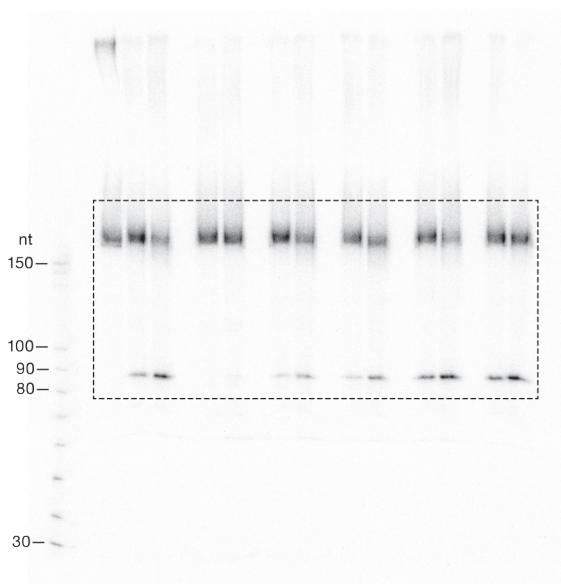

Extended Data Fig. 2a

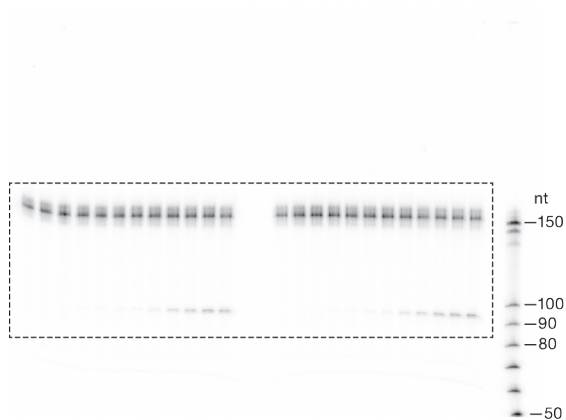

Extended Data Fig. 2b

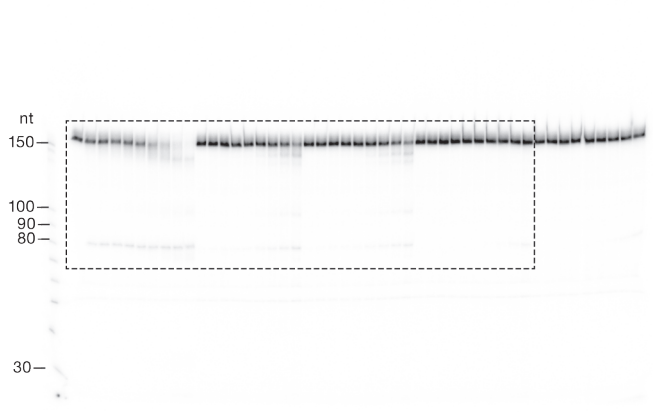

Arif et al., Supplementary Data Fig. 1.

Extended Data Fig. 3a

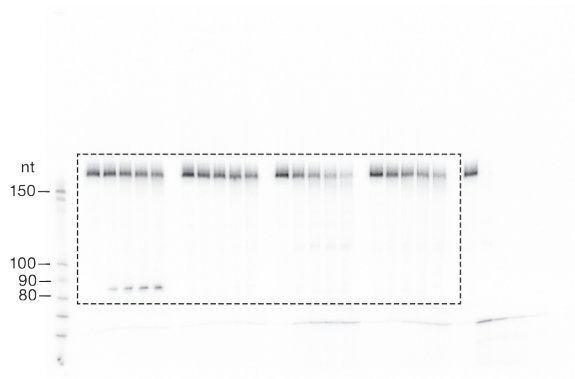

Extended Data Fig. 3b

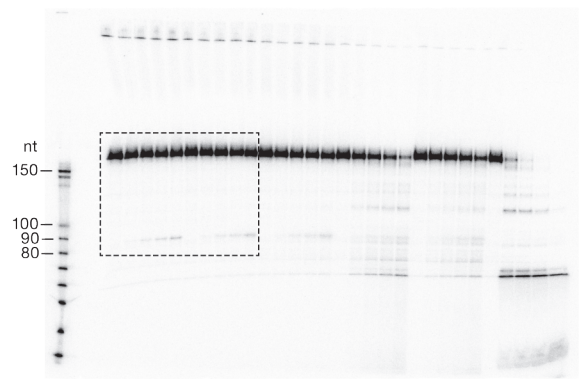

Extended Data Fig. 3c

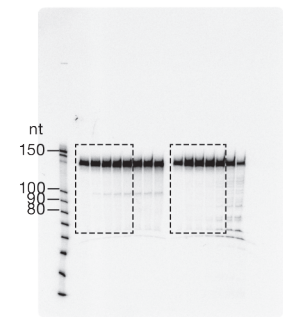

Extended Data Fig. 3d

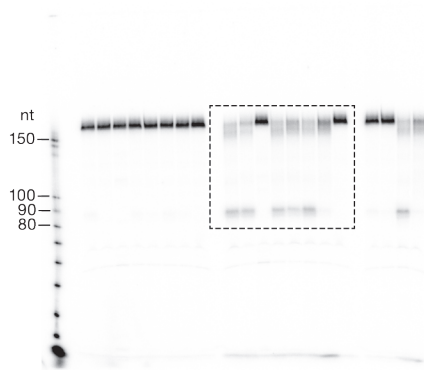

Extended Data Fig. 3f

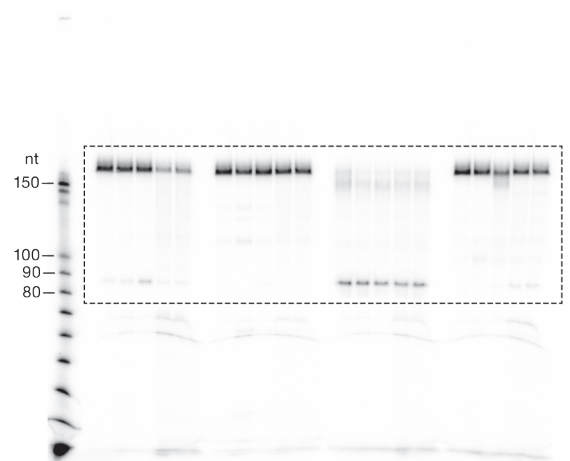

Extended Data Fig. 3g

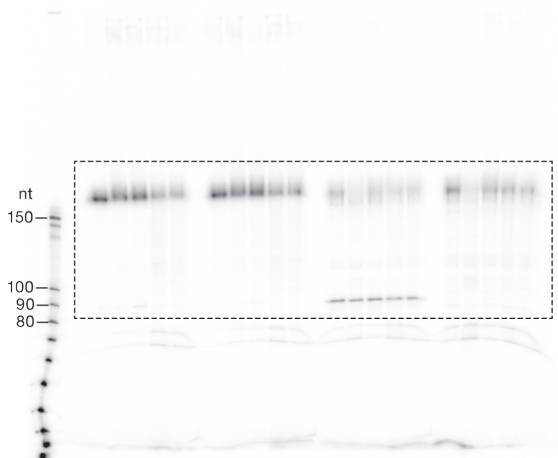

Extended Data Fig. 3h

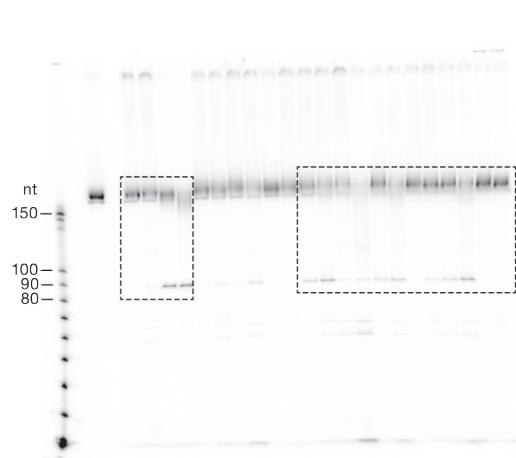



Figure 2b

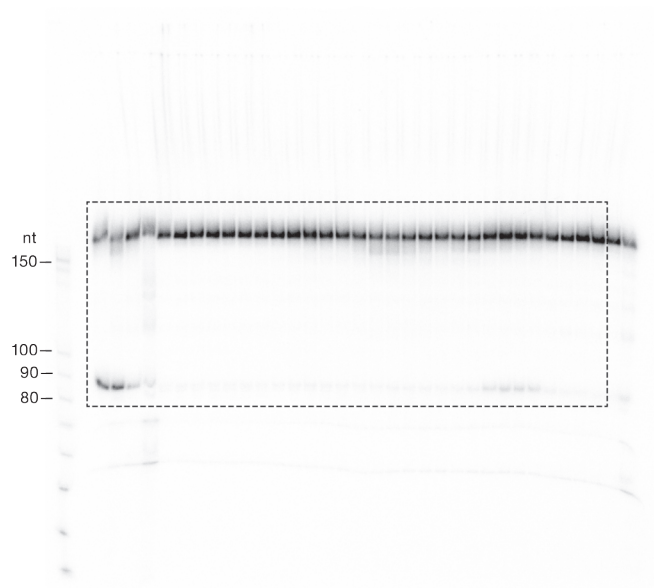

Figure 2e

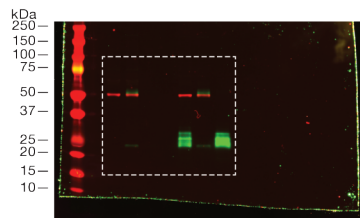

Extended Data Figure 4b

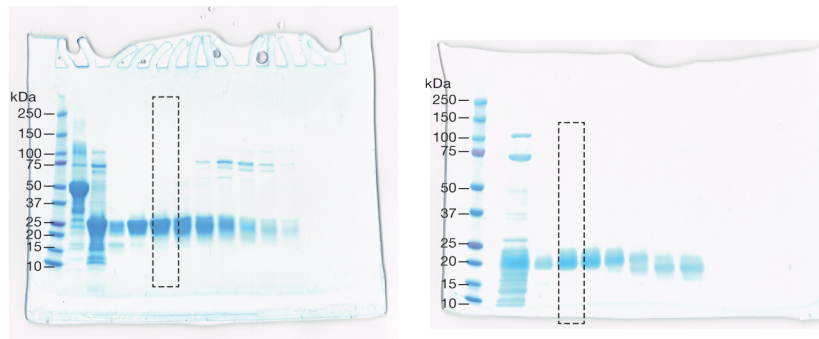

Figure 2f

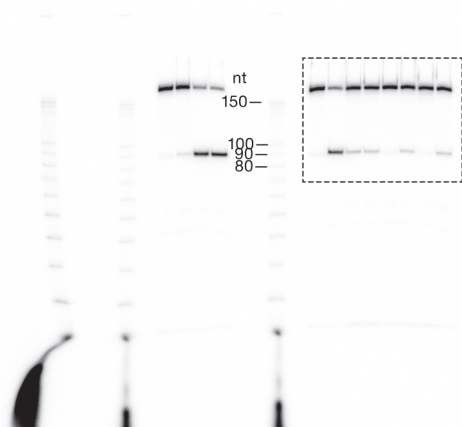

Extended Data Figure 4b (contd)

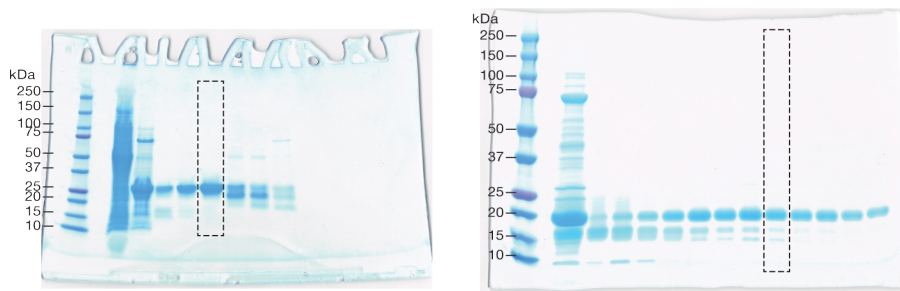

Extended Data Figure 4b (contd)

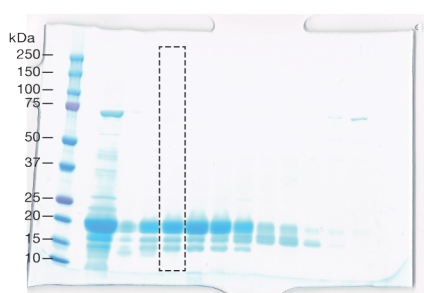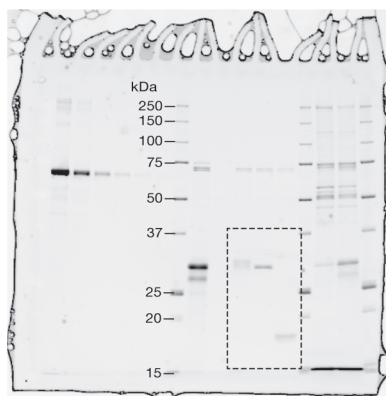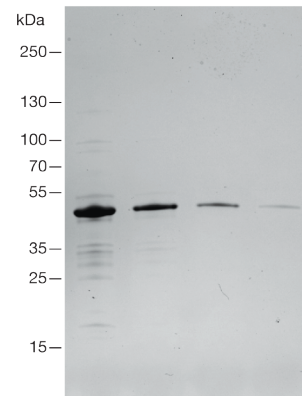



Figure 3b (100 nM target)

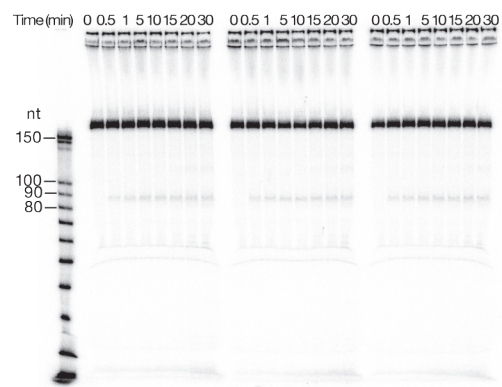

Figure 3c and Extended Data Fig. 5

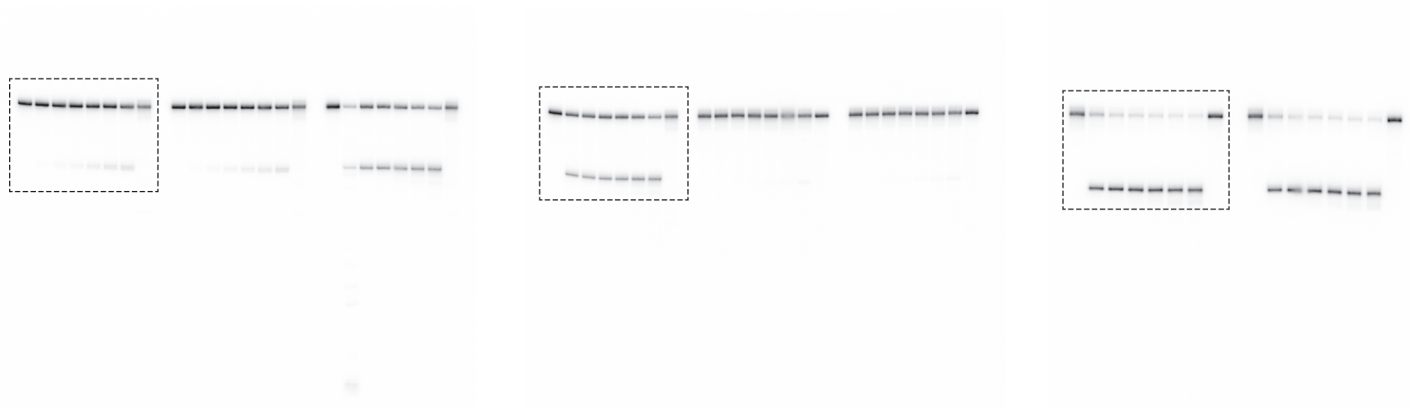

Figure 3d

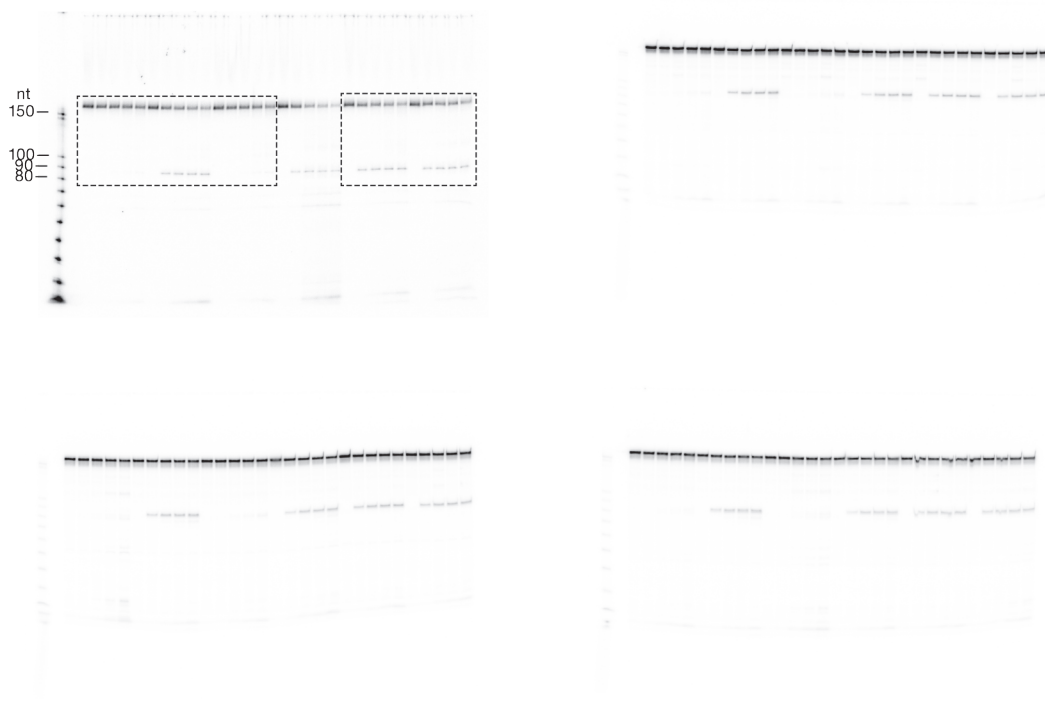

Figure 3e

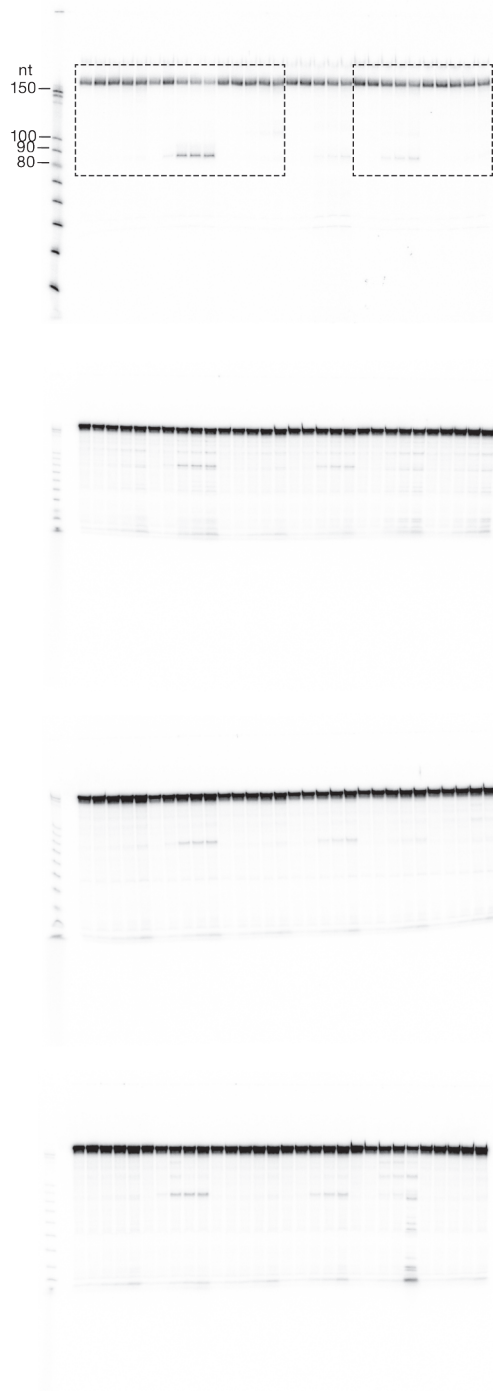

Figure 3g

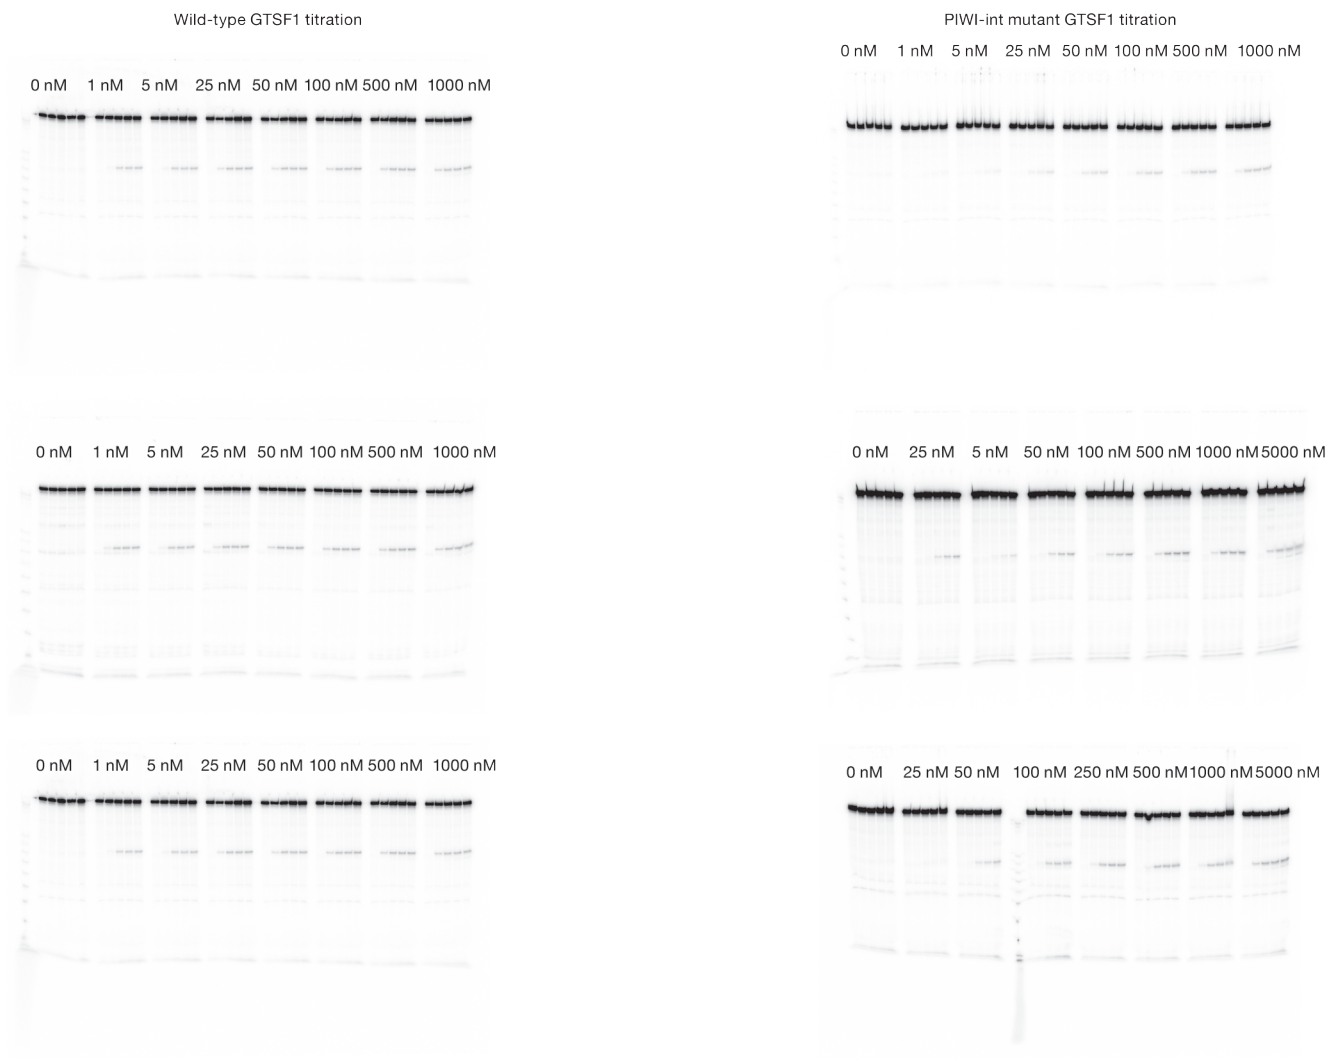

Figure 3h

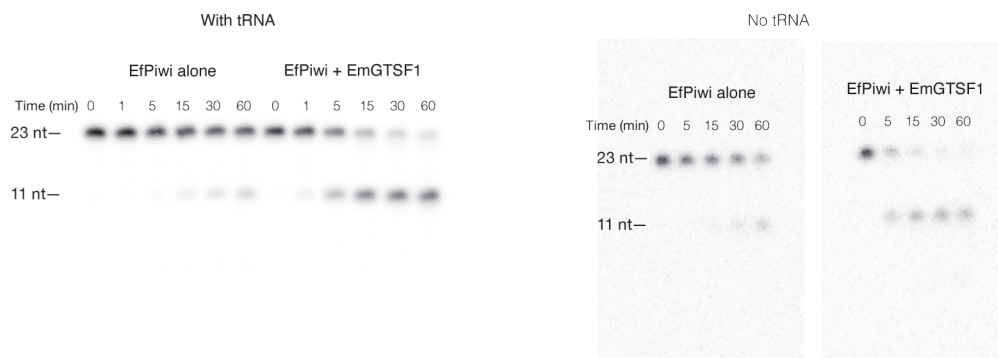



Extended Data Fig. 6a

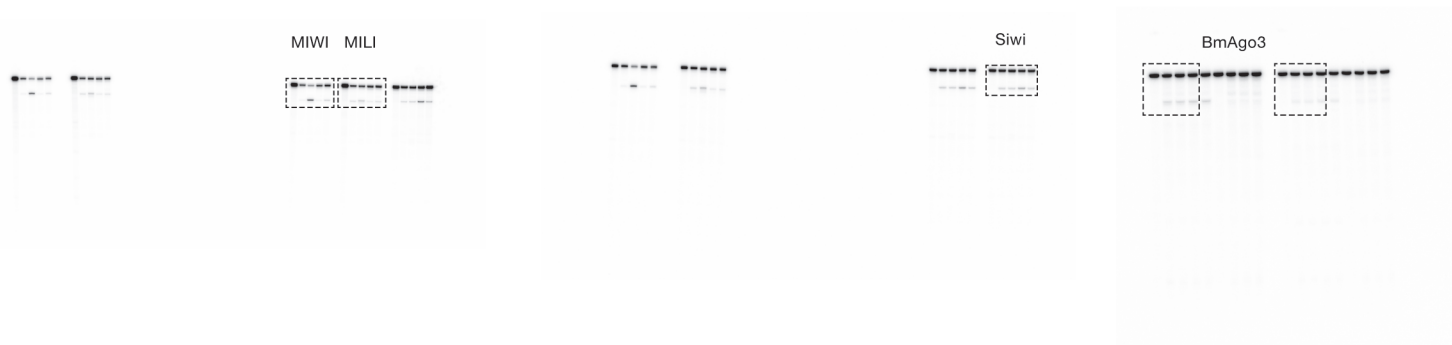

Extended Data Fig. 6b

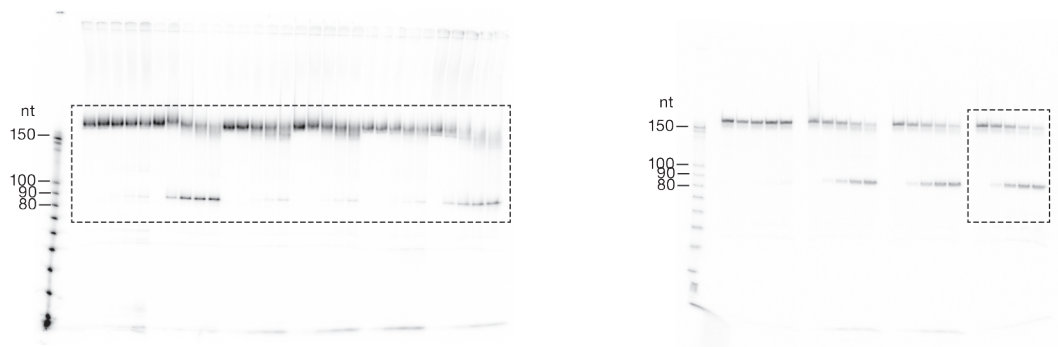

Figure 4a (Top)

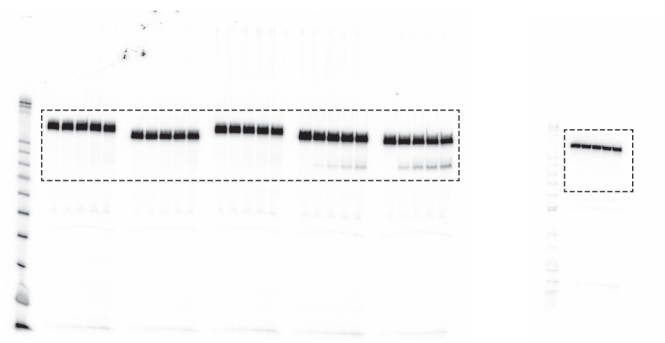

Figure 4a (Bottom)

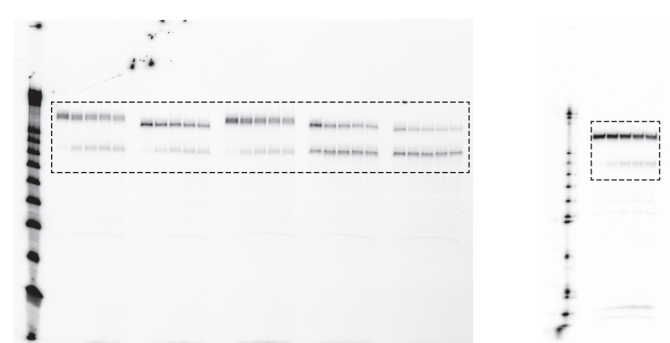

Extended Data Fig. 8a

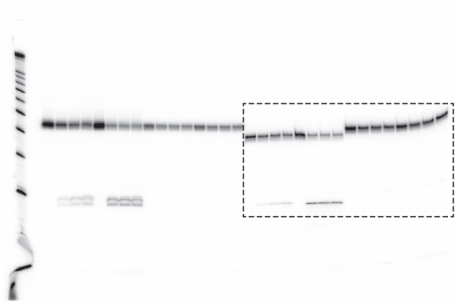

Extended Data Fig. 8b

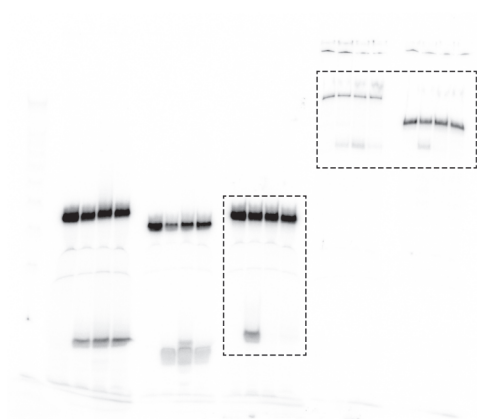

Figure 4b

MIWI (2-30 target)

MIWI (2-16 target)

MILI (2-30 target)

MILI (2-16 target)

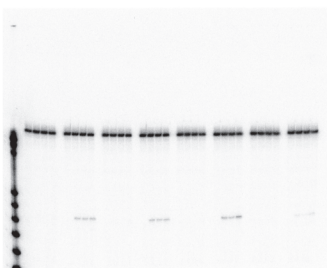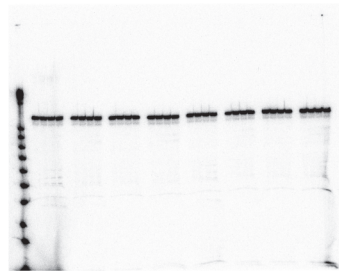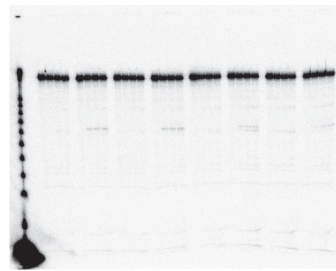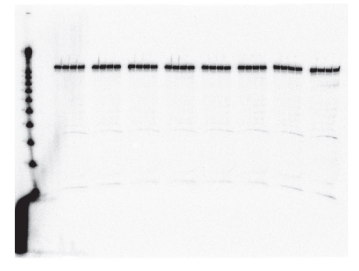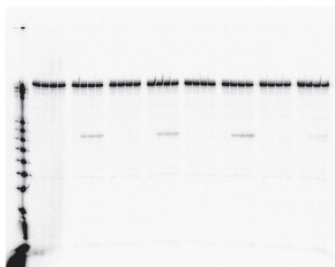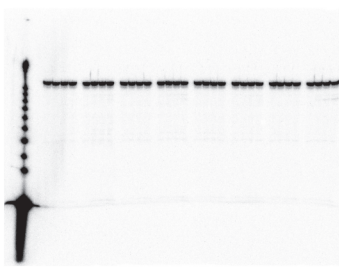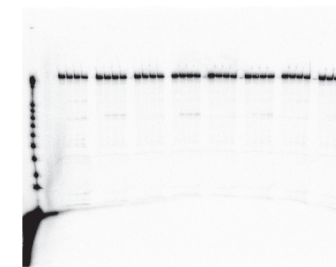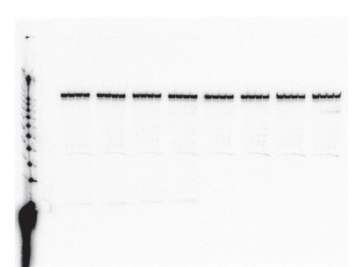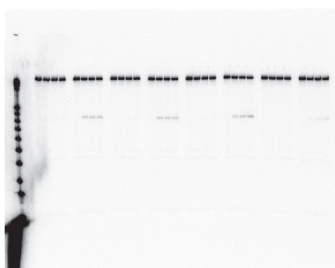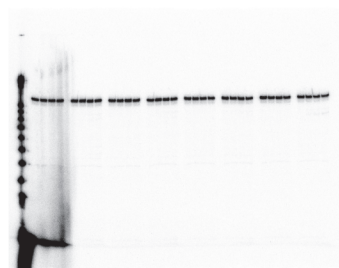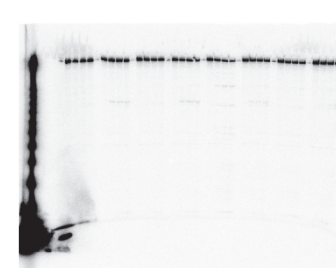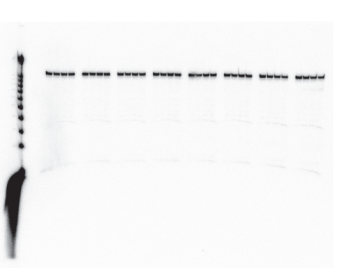

Figure 4c

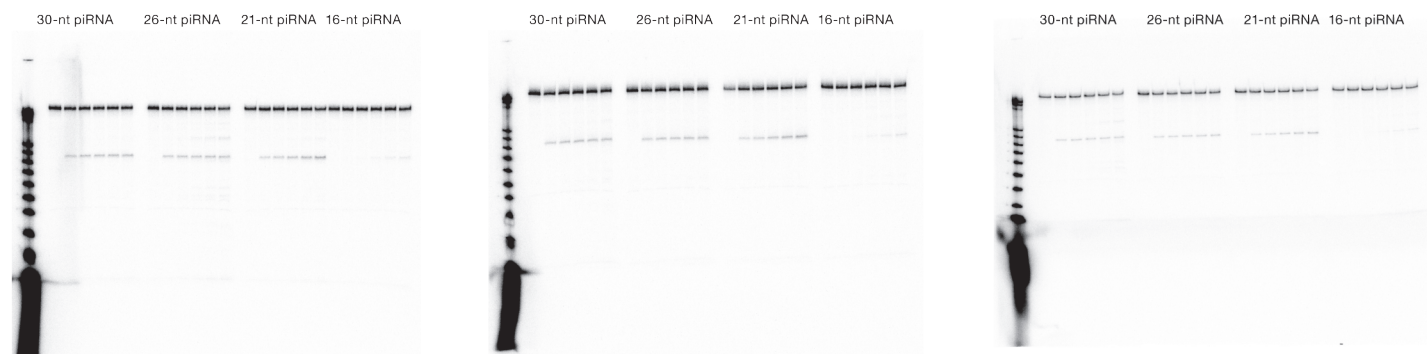

**Supplementary Data Fig. 1.** Uncropped gel images. Source electrophoretic data used in the indicated main and extended figures. Dashed boxes indicate gel cropping.
