# Supplementary material for: GTSF1 accelerates target RNA cleavage by PIWI-clade Argonaute proteins
Source: PubMed Central journal article supplement (PMC9385479; doi:10.1038/s41586-022-05009-0), 2022-06-30
Supplement: 41586_2022_5009_MOESM3_ESM.pdf [file 41586_2022_5009_MOESM3_ESM.pdf]

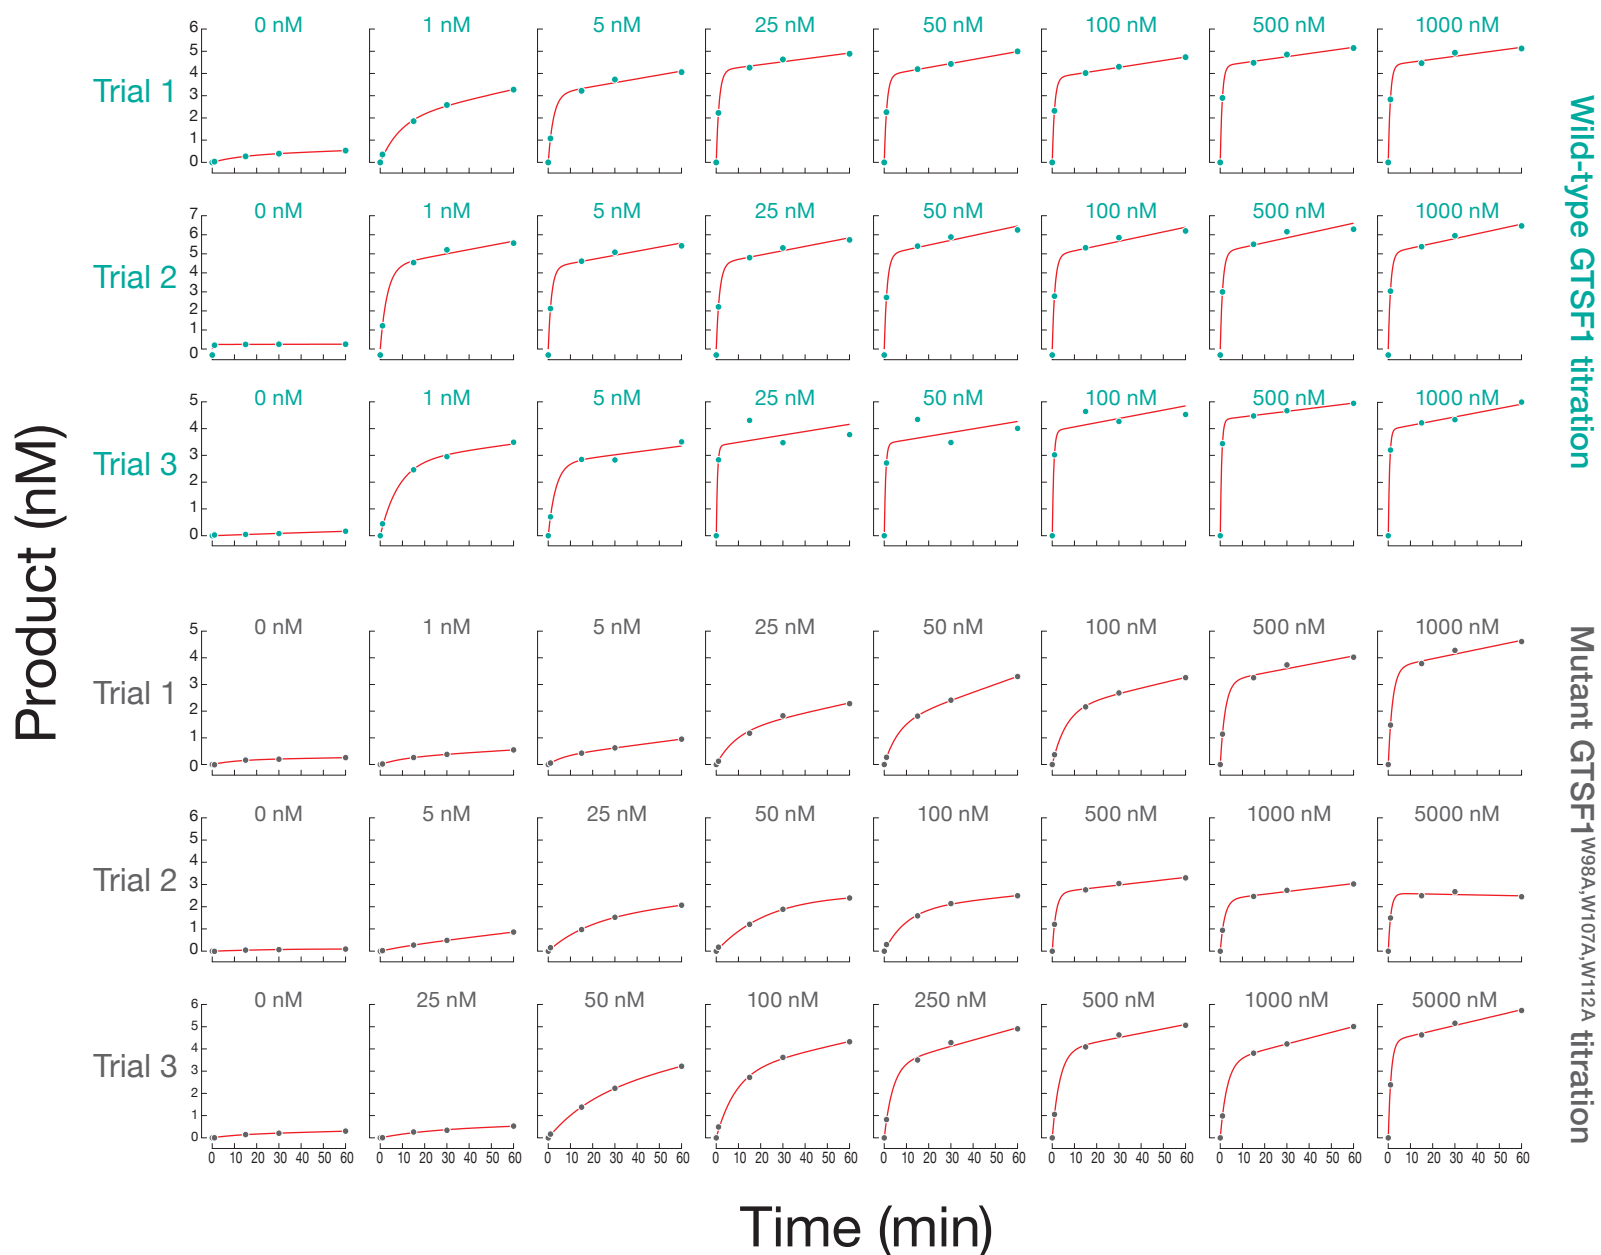

**Supplementary Data Fig. 2.** Wild-type and PIWI-int mutant GTSF1 titration. Time-course graphs showing effect of titrating wild-type and PIWI-interacting mutant GTSF1 on pre-steady-state catalytic rate of MIWI. Gel source data in Supplementary Data Fig. 1.
